# Supplementary material
Source: PubMed Central journal article supplement (PMC3259017)
Supplement: supp_ddr500_ddr500supp_fig3.pdf [file supp_ddr500_ddr500supp_fig3.pdf]

Fluorescent drugs

| Plate | Position | Luciferase/FRET |          |            |        | Luciferase |          |            |        | t-TEST |
|-------|----------|-----------------|----------|------------|--------|------------|----------|------------|--------|--------|
|       |          | Zi score*       | SD       | Fold inc** | t-TEST | Zi score*  | SD       | Fold inc** | t-TEST |        |
| 2     | A10      | 4.261384        | 0.155497 | 2.32       | ***    | -0.23661   | 0.328841 | 0.95       | NS     |        |
| 2     | C2       | 6.615773        | 0.27999  | 3.05       | ***    | -2.8185    | 0.150289 | 0.66       | ***    |        |
| 5     | E8       | 6.909629        | 0.212623 | 2.56       | ***    | -1.79103   | 0.091077 | 0.75       | ***    |        |
| 10    | C10      | 8.372019        | 0.174756 | 5.50       | ***    | 0.4764     | 0.148906 | 1.06       | NS     |        |
| 12    | E3       | 8.412165        | 0.100502 | 4.18       | ***    | -1.4102    | 0.101076 | 0.88       | **     |        |
| 16    | E6       | 3.568372        | 0.141309 | 1.77       | ***    | 0.658921   | 0.41178  | 1.07       | NS     |        |
| 31    | H2       | 7.76934         | 0.059377 | 2.85       | ***    | 0.763509   | 0.014033 | 1.05       | NS     |        |
| 36    | A5       | 5.147446        | 0.735293 | 1.68       | ***    | -0.41485   | 0.501427 | 0.99       | NS     |        |
| 43    | F4       | 3.380993        | 0.20963  | 1.55       | ***    | 0.1925     | 0.093127 | 1.02       | NS     |        |
| 43    | H6       | 4.106654        | 0.400686 | 1.67       | ***    | 0.676298   | 0.124614 | 1.08       | NS     |        |
| FRET  |          |                 |          |            |        |            |          |            |        |        |
|       |          | Zi score*       | SD       | Fold inc** | t-TEST | Zi score*  | SD       | Fold inc** | t-TEST |        |
| 3     | E11      | 3.668901        | 0.421378 | 1.40       | ***    | 4.846451   | 0.729085 | 1.40       | ***    | NS     |
| 7     | A9       | 3.027812        | 0.735634 | 1.54       | **     | 2.785536   | 0.5581   | 1.40       | ***    | *      |
| 11    | E11      | 3.668901        | 0.421378 | 1.34       | ***    | 4.846451   | 0.729085 | 1.41       | ***    | NS     |
| 15    | B6       | 3.108285        | 0.689252 | 1.58       | ***    | 3.432892   | 0.485029 | 1.61       | ***    | NS     |
| 15    | C7       | 2.801238        | 0.569841 | 1.53       | ***    | 3.11398    | 0.557888 | 1.61       | ***    | NS     |
| 20    | A11      | 2.853433        | 0.366843 | 1.36       | NS     | 3.022024   | 0.334296 | 1.22       | ***    | *      |
| 41    | H4       | 3.970585        | 0.175587 | 1.49       | ***    | 6.189866   | 0.155349 | 1.77       | ***    | ***    |
| 42    | E6       | 3.406292        | 0.628095 | 1.54       | ***    | 4.002816   | 0.382786 | 1.53       | ***    | NS     |
| 42    | G8       | 3.230887        | 0.48519  | 1.51       | ***    | 3.411343   | 0.211221 | 1.46       | ***    | NS     |
| 43    | G9       | 1.618133        | 0.501188 | 1.27       | ***    | 5.490128   | 0.355903 | 1.66       | ***    | ***    |

Non-fluorescent drugs

| Plate | Position | Luciferase/FRET |          |            |        | Luciferase |          |            |        | t-TEST |
|-------|----------|-----------------|----------|------------|--------|------------|----------|------------|--------|--------|
|       |          | Zi score*       | SD       | Fold inc** | t-TEST | Zi score*  | SD       | Fold inc** | t-TEST |        |
| 3     | E11      | 3.668901        | 0.421378 | 1.40       | ***    | 4.846451   | 0.729085 | 1.40       | ***    | NS     |
| 7     | A9       | 3.027812        | 0.735634 | 1.54       | **     | 2.785536   | 0.5581   | 1.40       | ***    | *      |
| 11    | E11      | 3.668901        | 0.421378 | 1.34       | ***    | 4.846451   | 0.729085 | 1.41       | ***    | NS     |
| 15    | B6       | 3.108285        | 0.689252 | 1.58       | ***    | 3.432892   | 0.485029 | 1.61       | ***    | NS     |
| 15    | C7       | 2.801238        | 0.569841 | 1.53       | ***    | 3.11398    | 0.557888 | 1.61       | ***    | NS     |
| 20    | A11      | 2.853433        | 0.366843 | 1.36       | NS     | 3.022024   | 0.334296 | 1.22       | ***    | *      |
| 41    | H4       | 3.970585        | 0.175587 | 1.49       | ***    | 6.189866   | 0.155349 | 1.77       | ***    | ***    |
| 42    | E6       | 3.406292        | 0.628095 | 1.54       | ***    | 4.002816   | 0.382786 | 1.53       | ***    | NS     |
| 42    | G8       | 3.230887        | 0.48519  | 1.51       | ***    | 3.411343   | 0.211221 | 1.46       | ***    | NS     |
| 43    | G9       | 1.618133        | 0.501188 | 1.27       | ***    | 5.490128   | 0.355903 | 1.66       | ***    | ***    |

\*plate-by-plate basis \*\*to dimso controls in the same plate

t-test, \*\*\*, p<0.001; \*\*, p<0.01; \*, p<0.05.

Zi>3 is considered a hit
